# Supplementary material
Source: ML conference proceedings conference paper supplement (https://openaccess.thecvf.com/content/CVPR2022/html/Jin_Single-Stage_Is_Enough_CVPR_2022_paper.html)
Supplement: Supplementary file 1 [file Jin_Single-Stage_Is_Enough_CVPR_2022_supplemental.pdf]

# Supplementary Material for Single-Stage is Enough: Multi-Person Absolute 3D Pose Estimation

## Abstract

In this supplementary material, we present fully detailed information on 1) Quantitative comparisons of MPJPE on CMU Panoptic [5] dataset; 2) hyper-parameters analysis for loss function; 3) sequence-wise results on MuPOTS-3D [8] dataset; 4) qualitative results on MuPOTS-3D [8] dataset; 5) multi-view visualization 3D poses upon in-the-wild images from COCO [6] validation set.

**A** This appendix provides quantitative comparisons between state-of-the-art methods and ours on CMU Panoptic [5] dataset.

MPJPE measures the accuracy of the 3D root-relative pose. It is computed by using the Euclidean distance between the estimated 3D joints and the groundtruth positions. Quantitative comparisons between state-of-the-art methods and ours are provided in Tab. 1.

Table 1. Quantitative comparisons of MPJPE on CMU Panoptic [5]. T denotes Top-down method, and B denotes Bottom-up method.

| Methods           | Haggling    | Mafia       | Ultim.      | Piazza      | Mean↓       |
|-------------------|-------------|-------------|-------------|-------------|-------------|
| CRP [4] (T)       | 129.6       | 133.5       | 153.0       | 156.7       | 143.2       |
| CDMP [10] (T)     | 89.6        | 91.3        | 79.6        | 90.1        | 87.6        |
| HMOR [13] (T)     | 50.9        | 50.5        | 50.7        | 68.2        | 51.6        |
| PandaNet [1] (T)  | <b>40.6</b> | <b>37.6</b> | <b>31.3</b> | <b>55.8</b> | <b>42.7</b> |
| MubyNet [14] (B)  | 72.4        | 78.8        | 66.8        | 94.3        | 72.1        |
| SMAP [15] (B)     | 63.1        | <b>60.3</b> | <b>56.6</b> | <b>67.1</b> | <b>61.8</b> |
| LoCO [3] (B)      | <b>45.0</b> | 95.0        | 58.0        | 79.0        | 69.0        |
| <b>DRM (Ours)</b> | <b>52.5</b> | <b>56.1</b> | <b>47.5</b> | <b>70.3</b> | <b>56.7</b> |

**B** This appendix provides experiments on parameter analysis of our loss function.

In sec. 3.3 in the manuscript, we use the hyper-parameters  $\lambda_o$ ,  $\lambda_{rz}$ ,  $\lambda_{\Delta z}$  and  $\lambda_p$  to balance different loss items. We compare the performance of our model with different hyper-parameters. On the whole, we should choose better values for loss hyper-parameters to solve the unbalance problem between all loss items.

Table 2. Study of loss hyper-parameters on the MuPoTS-3D [8] dataset for matched groundtruths.

| Loss hyper-parameters                                                    | PCK <sub>rel</sub> | PCK <sub>abs</sub> | PCK <sub>root</sub> | AUL <sub>rel</sub> |
|--------------------------------------------------------------------------|--------------------|--------------------|---------------------|--------------------|
| $\lambda_o, \lambda_{rz}, \lambda_{\Delta z}=0.3$<br>$\lambda_p=0.03$    | 83.5               | 39.8               | 43.4                | 42.9               |
| $\lambda_o, \lambda_{rz}, \lambda_{\Delta z}=0.03$<br>$\lambda_p=0.03$   | 83.6               | 39.7               | 43.7                | 43.0               |
| $\lambda_o, \lambda_{rz}, \lambda_{\Delta z}=0.03$<br>$\lambda_p=0.003$  | <b>85.1</b>        | <b>41.0</b>        | <b>45.6</b>         | <b>45.4</b>        |
| $\lambda_o, \lambda_{rz}, \lambda_{\Delta z}=0.03$<br>$\lambda_p=0.0003$ | 84.9               | 39.3               | 42.3                | 45.2               |

**C** This appendix provides more thorough experiments, *i.e.*, sequence-wise results on the MuPoTS-3D [8] dataset.

Due to the limited space, only the average PCK<sub>abs</sub> and PCK<sub>rel</sub> are reported in the main manuscript. Here we provide more detailed experimental results. Tab. 3 provides sequence-wise PCK<sub>abs</sub> on the MuPoTS-3D [8] dataset and demonstrates that over half sequences of our PCK<sub>abs</sub> is higher than the state-of-the-art bottom-up method SMAP [15]. Tab. 4 shows that our model has higher PCK<sub>rel</sub> in most sequences compared with all bottom-up methods and top-down methods.

**D** This appendix provides an additional visualized results of outdoor images from MuPoTS-3D [8] testing set. (Sec. 4.2)

Fig. 1 gives the visualized results of the estimated 3D poses upon outdoor images from MuPoTS-3D [8] testing set. It is shown that in outdoor challenging scenario (containing scale variance, occlusion, and drastic illumination changes), our method still performs surprisingly well.

**E** This appendix provides an additional results of the estimated 3D poses upon in-the-wild images from COCO [6] validation set in three views.

Fig. 2 provides the visualization results of the estimated 3D poses from in-the-wild images in three views, containing several scenarios, *e.g.*, various poses, scale variance, occlusion, *etc.* It can be seen from the top-down view that our method performs well in estimating the depth of all instances, which is hard to capture from other views.

Table 3. Sequence-wise PCK<sub>abs</sub> on the MuPoTS-3D [8] dataset for matched groundtruths.

| Methods                         | S1          | S2          | S3          | S4          | S5          | S6          | S7          | S8          | S9          | S10         |             |
|---------------------------------|-------------|-------------|-------------|-------------|-------------|-------------|-------------|-------------|-------------|-------------|-------------|
| CDMP [10] (Top-down)            | <b>59.5</b> | 45.3        | 51.4        | 46.2        | 53.0        | 27.4        | 23.7        | <b>26.4</b> | <b>39.1</b> | 23.6        |             |
| SMAP [15] (Bottom-up)           | 42.1        | 41.4        | 46.5        | 16.3        | 53.0        | 26.4        | 47.5        | 18.7        | 36.7        | <b>73.5</b> |             |
| <b>DRM (Ours, single-stage)</b> | 57.8        | <b>51.8</b> | <b>51.8</b> | <b>54.3</b> | <b>61.1</b> | <b>49.5</b> | <b>41.5</b> | 9.4         | 33.4        | 73.0        |             |
|                                 | S11         | S12         | S13         | S14         | S15         | S16         | S17         | S18         | S19         | S20         | Avg.        |
| CDMP [10] (Top-down)            | 18.3        | 14.9        | <b>38.2</b> | 29.5        | 36.8        | 23.6        | 14.4        | 20.0        | 18.8        | 25.4        | 31.8        |
| SMAP [15] (Bottom-up)           | <b>46.0</b> | 22.7        | 24.3        | 38.9        | <b>47.5</b> | <b>34.2</b> | <b>35.0</b> | 20.0        | 38.7        | <b>64.8</b> | 38.7        |
| <b>DRM (Ours, single-stage)</b> | 18.4        | <b>50.0</b> | 25.1        | <b>40.5</b> | 43.9        | 25.8        | 34.1        | <b>21.4</b> | <b>40.5</b> | 36.2        | <b>41.0</b> |

Table 4. Sequence-wise PCK<sub>rel</sub> on the MuPoTS-3D [8] dataset for matched groundtruths.

| Methods                        | S1          | S2          | S3          | S4          | S5          | S6          | S7          | S8          | S9          | S10         |             |
|--------------------------------|-------------|-------------|-------------|-------------|-------------|-------------|-------------|-------------|-------------|-------------|-------------|
| LCR-Net [11] (Top-down)        | 67.7        | 49.8        | 53.4        | 59.1        | 67.5        | 22.8        | 43.7        | 49.9        | 31.1        | 78.1        |             |
| LCR-Net++ [12] (Top-down)      | 87.3        | 61.9        | 67.9        | 74.6        | 78.8        | 48.9        | 58.3        | 59.7        | 78.1        | 89.5        |             |
| HG-RCNN [2] (Top-down)         | 85.1        | 67.9        | 73.5        | 76.2        | 74.9        | 52.5        | 65.7        | 63.6        | 56.3        | 77.8        |             |
| CDMP [10] (Top-down)           | <b>94.4</b> | 77.5        | 79.0        | 81.9        | 85.3        | 72.8        | 81.9        | 75.7        | <b>90.2</b> | <b>90.4</b> |             |
| ORPM [7] (Bottom-up)           | 81.0        | 59.9        | 64.4        | 62.8        | 68.0        | 30.3        | 65.0        | 59.2        | 64.1        | 83.9        |             |
| Xnect [9] (Bottom-up)          | 88.4        | 65.1        | 68.2        | 72.5        | 76.2        | 46.2        | 65.8        | 64.1        | 75.1        | 82.4        |             |
| SMAP [15] (Bottom-up)          | 88.8        | 71.2        | 77.4        | 77.7        | 80.6        | 49.9        | <b>86.6</b> | 51.3        | 70.3        | 89.2        |             |
| <b>DRM (Ours,single-stage)</b> | 91.2        | <b>81.0</b> | <b>83.8</b> | <b>84.2</b> | <b>90.6</b> | <b>77.3</b> | 80.1        | <b>81.7</b> | 88.9        | 86.5        |             |
|                                | S11         | S12         | S13         | S14         | S15         | S16         | S17         | S18         | S19         | S20         | Avg.        |
| LCR-Net [11] (Top-down)        | 50.2        | 51.0        | 51.6        | 49.3        | 56.2        | 66.5        | 65.2        | 62.9        | 66.1        | 59.1        | 53.8        |
| LCR-Net++ [12] (Top-down)      | 69.2        | 73.8        | 66.2        | 56.0        | 74.1        | 82.1        | 78.1        | 72.6        | 73.1        | 61.0        | 70.6        |
| HG-RCNN [2] (Top-down)         | 76.4        | 70.1        | 65.3        | 51.7        | 69.5        | 87.0        | 82.1        | 80.3        | 78.5        | 70.7        | 71.3        |
| CDMP [10] (Top-down)           | 79.2        | 79.9        | 75.1        | 72.7        | 81.1        | 89.9        | <b>89.6</b> | 81.8        | 81.7        | 76.2        | 81.8        |
| ORPM [7] (Bottom-up)           | 67.2        | 68.3        | 60.6        | 56.5        | 69.9        | 79.4        | 79.6        | 66.1        | 66.3        | 63.5        | 65.0        |
| Xnect [9] (Bottom-up)          | 74.1        | 72.4        | 64.4        | 58.8        | 73.7        | 80.4        | 84.3        | 67.2        | 74.3        | 67.8        | 70.4        |
| SMAP [15] (Bottom-up)          | 72.3        | 81.7        | 63.6        | 44.8        | 79.7        | 86.9        | 81.0        | 75.2        | 73.6        | 67.2        | 73.5        |
| <b>DRM (Ours,single-stage)</b> | <b>82.9</b> | <b>87.3</b> | <b>82.7</b> | <b>76.1</b> | <b>84.4</b> | <b>92.3</b> | 88.1        | <b>85.6</b> | <b>85.6</b> | <b>92.4</b> | <b>85.1</b> |

## References

- [1] A. Benzine, F. Chabot, B. Luvion, Q. C. Pham, and C. Achard. Pandanet: Anchor-based single-shot multi-person 3d pose estimation. In *CVPR*, 2020. 1
- [2] Rishabh Dabral, Nitesh B Gundavarapu, Rahul Mitra, Abhishek Sharma, Ganesh Ramakrishnan, and Arjun Jain. Multi-person 3d human pose estimation from monocular images. In *3DV*, 2019. 2
- [3] Matteo Fabbri, Fabio Lanzi, Simone Calderara, Stefano Alletto, and Rita Cucchiara. Compressed volumetric heatmaps for multi-person 3d pose estimation. In *CVPR*, 2020. 1
- [4] Wen Jiang, Nikos Kolotouros, Georgios Pavlakos, Xiaowei Zhou, and Kostas Daniilidis. Coherent reconstruction of multiple humans from a single image. In *CVPR*, 2020. 1
- [5] H. Joo, T. Simon, X. Li, H. Liu, L. Tan, L. Gui, S. Banerjee, T. Godisart, B. Nabbe, and I. Matthews. Panoptic studio: A massively multiview system for social interaction capture. *TPAMI*, pages 1–1, 2016. 1
- [6] T. Y. Lin, M. Maire, S. Belongie, J. Hays, and C. L. Zitnick. Microsoft coco: Common objects in context. *ECCV*, 2014. 1
- [7] Dushyant Mehta, Oleksandr Sotnychenko, Franziska Mueller, Weipeng Xu, Srinath Sridhar, Gerard Pons-Moll, and Christian Theobalt. Single-shot multi-person 3d pose estimation from monocular rgb. In *3DV*, 2018. 2
- [8] D. Mehta, O. Sotnychenko, F. Mueller, W. Xu, and C. Theobalt. Single-shot multi-person 3d pose estimation from monocular rgb. In *3DV*, 2018. 1, 2, 3
- [9] Dushyant Mehta, Oleksandr Sotnychenko, Franziska Mueller, Weipeng Xu, and Christian Theobalt. Xnect: real-time multi-person 3d motion capture with a single rgb camera. *TOG*, 39(4), 2020. 2
- [10] G. Moon, J. Y. Chang, and K. M. Lee. Camera distance-aware top-down approach for 3d multi-person pose estimation from a single rgb image. In *ICCV*, 2020. 1, 2
- [11] Grégory Rogez, Philippe Weinzaepfel, and Cordelia Schmid. Lcr-net: Localization-classification-regression for human pose. In *CVPR*, 2017. 2
- [12] Grégory Rogez, Philippe Weinzaepfel, and Cordelia Schmid. LCR-Net++: Multi-person 2D and 3D Pose Detection in Natural Images. *TPAMI*, 2019. 2
- [13] Can Wang, Jiefeng Li, Wentao Liu, Chen Qian, and Cewu Lu. Hmor: Hierarchical multi-person ordinal relations for monocular multi-person 3d pose estimation. In *ECCV*, pages 242–259, 2020. 1
- [14] Andrei Zanfir, Elisabeta Marinoiu, Mihai Zanfir, Alin Ionut Popa, and Cristian Sminchisescu. Deep network for the integrated 3d sensing of multiple people in natural images. In *NIPS*, pages 8410–8419, 2018. 1
- [15] Jianan Zhen, Qi Fang, Jiaming Sun, Wentao Liu, Wei Jiang, Hujun Bao, and Xiaowei Zhou. Smap: Single-shot multi-person absolute 3d pose estimation. In *ECCV*, pages 550–566, 2020. 1, 2

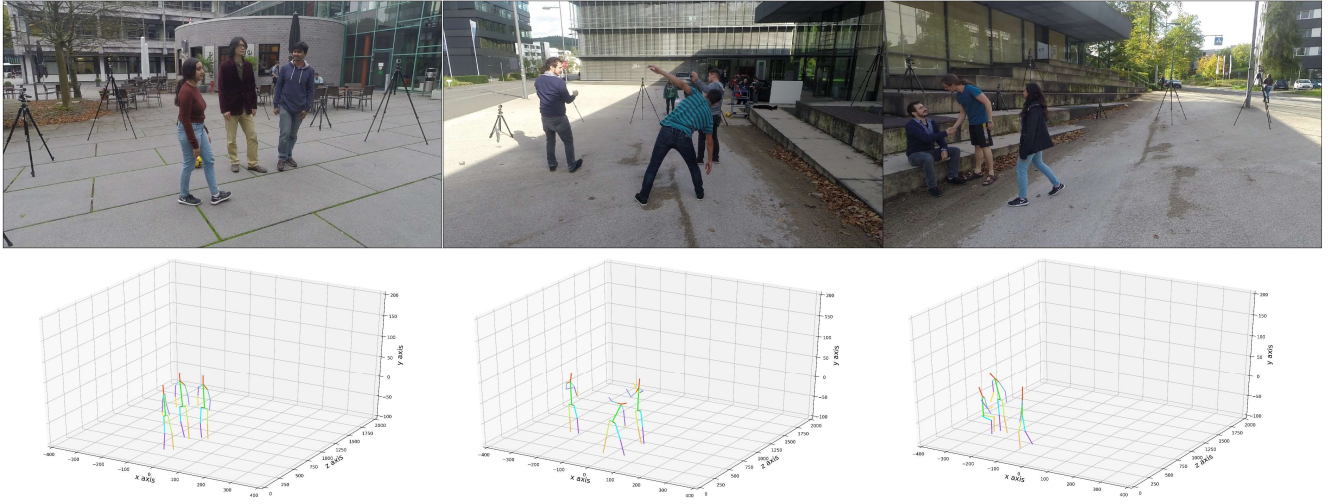

Figure 1. Visualized results of outdoor images from MuPoTS-3D [8] testing set. Top row: input image. Bottom row: corresponding multi-person 3D pose estimation of the proposed DRM.

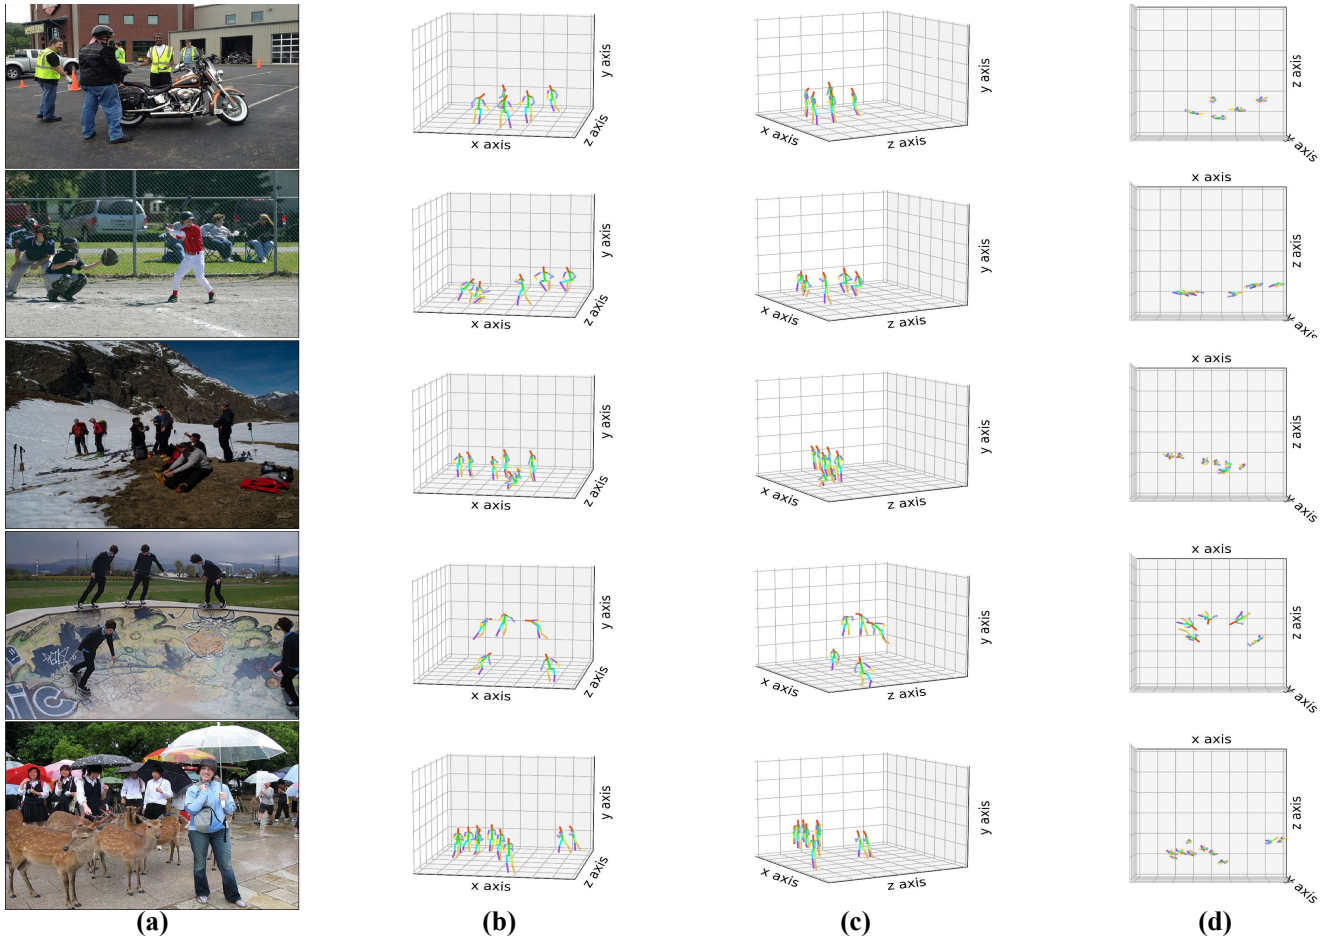

Figure 2. Visualization results of different views for in-the-wild images from COCO validation set. (a) origin image (b) front view (c) right view (d) top-down view
